# Supplementary material for: Life history response of Echinops gmelinii Turcz. to variation in the rainfall pattern in a temperate desert
Source: PeerJ. 2019 Nov 29;7:e8159. doi: 10.7717/peerj.8159 (PMC6886482; doi:10.7717/peerj.8159)
Supplement: File S1 [file peerj-07-8159-s001.xlsx]

## Sheet: Fig.1
Years	Total precipitation (mm)		Months	Average monthly precipitation (mm)	Precipitation days per month (day)
1955	170.4		1	1.2	1.8
1956	245.8		2	1.1	1.5
1957	88.3		3	4.1	1.9
1958	312.4		4	13.2	3.6
1959	180.2		5	20.5	5.7
1960	156.7		6	23.8	7.1
1961	297.3		7	35.3	6.9
1962	161.5		8	54	8.9
1963	97.1		9	22.2	6.3
1964	257.3		10	10.1	4.2
1965	121.6		11	1.7	1.2
1966	96.4		12	0.4	0.7
1967	246.8
1968	385.7
1969	150.5
1970	149.6
1971	203.6
1972	186.9
1973	185.7
1974	118.4
1975	107.5
1976	125.3
1977	205.7
1978	495.8
1979	251.2
1980	95.3
1981	141.4
1982	105.3
1983	203.7
1984	180.4
1985	297.3
1986	175.9
1987	141.6
1988	190.3
1989	198.2
1990	218.4
1991	121
1992	180.7
1993	181.8
1994	201.8
1995	219.9
1996	215.4
1997	157.8
1998	200.5
1999	141.2
2000	151.6
2001	225.1
2002	286.6
2003	246.6
2004	136.6
2005	74.4
2006	124.6
2007	271.2
2008	134.6
2009	147.6
2010	134.2
2011	191.7
2012	197.8
2013	127.7
2014	230.9
2015	139

## Sheet: Fig.2
	Rainfall frequency(interval-day)
	3d			5d			10d			15d			30d
Rainfall amount	Survival plants	Total	Survival rate (%)	Survival plants	Total	Survival rate (%)	Survival plants	Total	Survival rate (%)	Survival plants	Total	Survival rate (%)	Survival plants	Total	Survival rate (%)
1.5	6	12	50	6	12	50	12	12	100	11	11	100	7	10	70
1.25	4	12	33.3333	3	12	25	12	12	100	8	10	80	6	12	50
1	4	12	33.3333	0	12	0	9	12	75	9	12	75	6	12	50
0.75	4	12	33.3333	0	12	0	6	12	50	7	12	58.3333	4	11	36.3636
0.5	3	12	25	0	12	0	0	12	0	4	11	36.3636	0	12	0
Note: In some treatments the total number of plants less than 12 was due to pest damage.

## Sheet: Fig.3A-B
Treatments		Plant height(cm)
Rainfall amount	Rainfall frequency(interval-day)	2018-04-03	2018-04-30	2018-05-30
1.5	3	8	16	21
1.5	3	6	9	10
1.5	3	7	29	31
1.5	3	7	28	32
1.5	3	11	41	50
1.5	3	10	20	25
1.5	3	11	24	27
1.5	3	5	13	15
1.5	5	6	20	23
1.5	5	6	21	25
1.5	5	14	27	30
1.5	5	7	11	17
1.5	5	8	16	20
1.5	5	12	24	26
1.5	5	11	40	43
1.5	5	12	48	51
1.5	5	6	10	19
1.5	5	8	22	24
1.5	10	6	15	33
1.5	10	10	36	39
1.5	10	9	21	30
1.5	10	11	30	33
1.5	10	10	19	23
1.5	10	10	30	30
1.5	10	7	28	35
1.5	10	7	34	38
1.5	15	8	19	20
1.5	15	10	23	23
1.5	15	6	15	22
1.5	15	6	18	19
1.5	15	6	18	21
1.5	15	8	19	25
1.5	15	9	19	19
1.5	15	10	25	26
1.5	15	6	13	16
1.5	15	10	28	33
1.5	30	10	30	37
1.5	30	9	21	30
1.5	30	6	16	23
1.5	30	11	20	30
1.5	30	4	9	12
1.5	30	9	22	25
1.5	30	11	35	36
1.5	30	7	15	28
1.5	30	5	13	28
1.25	3	6	14	15
1.25	3	10	18	24
1.25	3	6	15	18
1.25	3	10	32	32
1.25	3	8	21	30
1.25	3	5	7	10
1.25	3	5	9	11
1.25	3	5	10	12
1.25	5	10	27	28
1.25	5	5	10	10
1.25	5	7	16	20
1.25	5	10	17	19
1.25	5	10	15	15
1.25	5	10	18	23
1.25	10	5	8	11
1.25	10	8	20	26
1.25	10	10	19	26
1.25	10	12	33	34
1.25	10	10	21	25
1.25	10	10	28	29
1.25	15	6	13	13
1.25	15	5	10	14
1.25	15	10	22	22
1.25	15	12	34	35
1.25	15	9	18	25
1.25	15	5	11	18
1.25	15	9	18	18
1.25	15	6	15	15
1.25	15	10	23	24
1.25	30	10	24	24
1.25	30	4	8	14
1.25	30	5	9	14
1.25	30	5	10	18
1.25	30	12	32	35
1.25	30	9	20	24
1.25	30	5	10	16
1	3	8	12	25
1	3	12	27	27
1	3	8	15	17
1	5	7	17	26
1	5	7	8	10
1	5	9	21	22
1	10	5	12	15
1	10	10	22	23
1	10	7	13	22
1	10	11	22	23
1	10	10	19	29
1	10	13	25	25
1	10	7	12	20
1	15	10	20	24
1	15	12	23	24
1	15	9	19	21
1	15	10	21	21
1	15	10	20	21
1	15	4	8	12
1	15	6	13	16
1	15	9	20	20
1	15	12	25	27
1	30	5	9	12
1	30	12	38	38
1	30	10	19	27
1	30	9	18	24
1	30	6	14	27
1	30	5	7	13
0.75	3	7	17	30
0.75	3	12	22	23
0.75	3	10	20	31
0.75	3	4	6	10
0.75	3	7	14	20
0.75	3	8	17	27
0.75	3	12	22	27
0.75	5	6	10	14
0.75	5	7	12	20
0.75	5	5	8	16
0.75	5	11	20	22
0.75	5	6	15	18
0.75	10	12	25	28
0.75	10	14	30	43
0.75	10	8	18	35
0.75	10	12	22	30
0.75	10	12	25	36
0.75	10	14	28	31
0.75	15	12	24	27
0.75	15	12	23	23
0.75	15	9	17	22
0.75	15	6	9	12
0.75	15	12	28	28
0.75	15	7	17	19
0.75	30	6	10	20
0.75	30	8	18	27
0.75	30	12	30	32
0.75	30	9	18	22
0.5	3	6	8	8
0.5	3	10	23	24
0.5	3	10	14	14
0.5	5	6	9	12
0.5	5	6	9	13
0.5	5	5	10	10
0.5	10	3	6	6
0.5	10	6	8	12
0.5	10	5	12	14
0.5	15	4	6	12
0.5	15	8	14	19
0.5	15	8	17	18
0.5	15	10	21	25
0.5	15	6	12	16
0.5	30	4	9	12
0.5	30	4	9	13
0.5	30	9	13	22
0.5	30	5	10	21

## Sheet: Fig.3C-E and Fig.4
Treatments		Plant height (cm)	Total biomass (g)	Root/shoot ratio	Number of capitula per plant	Number of seeds per plant	Mass of 100 seeds (g)	Reproductive effort
Rainfall amount	Rainfall frequency(interval-day)
1.5	3	22	5.8	0.0989011	3	90	1.36333	0.277931
1.5	3	29	3.179	0.082397	2	62	0.91129	0.323058
1.5	3	24	5.942	0.0977277	3	123	0.865854	0.318243
1.5	3	28	1.994	0.113345	2	25	0.84	0.203109
1.5	3	26.5	3.82	0.0894212	2	65	0.829301	0.274241
1.5	3	26	4.621	0.121696	3	85	1.16094	0.293066
1.5	5	24	4.389	0.157132	2	106	1.13302	0.243358
1.5	5	24	1.628	0.0817276	1	5	1.02214	0.246314
1.5	5	24	3.845	0.10425	1	39	1.02821	0.217165
1.5	5	15	2.023	0.08705	1	30	0.793333	0.232823
1.5	5	24	3.952	0.0655163	2	100	1.134	0.274241
1.5	5	19	3.1674	0.0991352	1	56	1.02214	0.24278
1.5	10	22	8.052	0.0821126	7	128	1.16094	0.372355
1.5	10	30	5.973	0.0645161	4	168	1.00476	0.373012
1.5	10	35	3.981	0.112944	4	60	1.00167	0.305953
1.5	10	34.5	3.682	0.0997611	3	77	1.14805	0.3327
1.5	10	32	3.123	0.080249	2	58	1.01552	0.31316
1.5	10	33.5	7.855	0.10354	8	205	1.13024	0.386378
1.5	10	30	7.096	0.0950617	4	139	1.33381	0.374718
1.5	10	40	5.877	0.0753888	3	117	1.50427	0.366173
1.5	10	33	3.662	0.0614493	3	91	1.28352	0.374113
1.5	10	35	7.287	0.0717753	5	219	1.26347	0.480445
1.5	10	29	4.507	0.0730669	4	113	1.03544	0.362789
1.5	10	32	6.811	0.0962927	5	139	1.33381	0.373012
1.5	15	20	2.461	0.121696	2	16	0.98375	0.267046
1.5	15	28	4.055	0.149376	2	77	0.97013	0.281381
1.5	15	22	2.644	0.104428	1	13	1.03846	0.212179
1.5	15	25	2.575	0.0693522	3	67	1.03134	0.309515
1.5	15	28	3.332	0.117371	2	65	0.961538	0.289616
1.5	15	26	3.114	0.135667	1	28	0.878571	0.249326
1.5	15	25	4.507	0.0923413	2	61	1.02623	0.265365
1.5	15	25	2.475	0.119352	1	34	1.04134	0.299515
1.5	15	26.5	3.532	0.0917371	2	70	0.961538	0.249616
1.5	15	22	2.744	0.0894428	2	55	0.846154	0.252179
1.5	15	24	4.213	0.151029	1	28	1.08812	0.269792
1.5	30	16.5	3.796	0.0967928	2	68	1.14265	0.282139
1.5	30	24	2.996	0.100257	1	36	1.01667	0.2253
1.5	30	30	3.367	0.0641593	2	57	1.09474	0.25245
1.5	30	25	2.486	0.112304	1	51	1.02941	0.284795
1.5	30	28	3.524	0.0923451	2	60	1.05737	0.257695
1.5	30	24	2.746	0.0819451	1	54	1.08941	0.247165
1.5	30	25.5	3.213	0.105845	1	45	1.06582	0.278653
1.25	3	25	2.506	0.0551579	3	55	1.01636	0.25834
1.25	3	30	5.427	0.180039	2	103	1.15922	0.262207
1.25	3	17	4.039	0.0936908	1	67	1.07015	0.252538
1.25	3	24	3.99	0.109629	2	75	1.08191	0.257695
1.25	5	14	3.303	0.102705	1	40	0.949474	0.211828
1.25	5	20	3.845	0.10425	1	39	1.02821	0.217165
1.25	5	19	1.905	0.0967185	1	28	0.8	0.211549
1.25	10	27	2.791	0.0843046	2	49	0.895918	0.293085
1.25	10	24	4.039	0.0936908	2	67	1.07015	0.252538
1.25	10	33	6.56	0.0855535	4	205	1.20293	0.428506
1.25	10	26	4.387	0.0899179	3	91	0.8	0.33736
1.25	10	32	5.356	0.0988921	4	98	1.34592	0.398805
1.25	10	28	5.427	0.180039	2	103	1.15922	0.262207
1.25	10	28	4.466	0.090332	2	75	1.304	0.315495
1.25	10	33	9.561	0.0901938	4	227	1.29692	0.385629
1.25	10	27.5	5.565	0.0913905	4	109	1.11101	0.322013
1.25	10	28.5	5.156	0.0908921	3	112	1.14592	0.308805
1.25	10	23.5	4.239	0.0936908	2	80	1.07015	0.252538
1.25	10	33	6.655	0.116855	4	150	1.17929	0.437203
1.25	15	23	3.862	0.0857464	2	56	1.10357	0.251165
1.25	15	20.5	5.623	0.0675907	3	120	1.11667	0.222959
1.25	15	24	1.474	0.0581479	1	44	0.865909	0.25346
1.25	15	24	2.804	0.100039	2	28	1	0.256822
1.25	15	22	2.055	0.0850053	2	36	0.919444	0.26764
1.25	15	17	3.404	0.0923107	2	48	1.00357	0.268225
1.25	15	25	1.955	0.0750053	1	28	0.819444	0.22764
1.25	15	22.5	4.132	0.0706017	3	95	1.18034	0.255363
1.25	30	26	2.74	0.0973168	2	57	0.924561	0.293066
1.25	30	23	1.096	0.0883813	1	1	0.733333	0.188504
1.25	30	24	2.403	0.0819451	1	30	0.776667	0.149397
1.25	30	19	1.237	0.0812937	1	6	0.907742	0.205335
1.25	30	28	6.511	0.0941018	1	124	1.01053	0.231439
1.25	30	26	2.517	0.134806	1	48	0.804583	0.282082
1	3	33	2.837	0.181099	2	43	0.909302	0.179415
1	3	26	2.86	0.131812	2	40	0.87875	0.203292
1	3	16	3.468	0.149867	1	90	0.9	0.206246
1	3	25	3.055	0.154259	2	58	0.9	0.196318
1	10	24.5	3.345	0.126642	2	69	0.908696	0.263378
1	10	27	2.57	0.064623	2	79	0.950633	0.345914
1	10	21	4.335	0.07809	2	77	0.87013	0.230219
1	10	22.5	5.829	0.115598	3	107	1.23271	0.300738
1	10	31	5.339	0.104468	3	171	0.987135	0.292208
1	10	23	4.401	0.107727	2	101	1.04158	0.266303
1	10	21.5	3.88	0.0966648	2	95	1.10105	0.315722
1	10	26	2.521	0.0885147	1	21	1.12857	0.312178
1	10	30	4.028	0.097791	2	90	1.02756	0.290833
1	15	24	3.03	0.13867	3	81	0.848148	0.275908
1	15	23	2.916	0.121538	1	50	0.918	0.204733
1	15	24	3.122	0.0946704	2	71	1.10704	0.213901
1	15	21	2.776	0.105536	1	54	1.00185	0.2817
1	15	22	4.197	0.117412	5	95	0.931579	0.286395
1	15	25	2.671	0.0791919	2	99	0.728283	0.218982
1	15	19	3.131	0.112651	3	42	0.795238	0.20748
1	15	20	2.814	0.101538	1	64	0.898148	0.214733
1	15	25	3.426	0.118367	3	76	0.910464	0.267867
1	30	17	2.248	0.0974255	2	40	1.00078	0.239926
1	30	26	2.366	0.0778098	1	84	0.913095	0.208176
1	30	26	3.131	0.112651	3	42	0.795238	0.18748
1	30	22	2.581	0.0959621	2	55	0.903036	0.211861
1	30	27	3.213	0.0978098	3	70	0.923095	0.20748
1	30	18	1.95	0.0963317	1	41	0.882977	0.216242
0.75	3	22.2	2.141	0.11977	1	49	0.74898	0.170542
0.75	3	18	3.955	0.168793	1	79	0.889873	0.176994
0.75	3	20	2.462	0.131954	2	38	0.986842	0.186434
0.75	3	25	2.852	0.140172	1	55	0.875232	0.17799
0.75	10	25.5	1.526	0.123497	1	58	0.793103	0.263041
0.75	10	27.5	3.17	0.0673401	1	50	1.044	0.228391
0.75	10	24.5	2.68	0.0997128	1	47	0.97234	0.240299
0.75	10	21	3.748	0.121484	1	59	0.984746	0.227855
0.75	10	26.8	5.51	0.137725	2	119	0.818487	0.236298
0.75	10	24	3.32	0.0937222	2	67	0.922535	0.239177
0.75	15	25	2.583	0.175159	1	67	0.953284	0.216415
0.75	15	19	2.516	0.0891775	1	9	0.960886	0.255564
0.75	15	25	3.247	0.100678	1	49	0.908163	0.178934
0.75	15	22	2.992	0.101215	2	66	1.02121	0.182754
0.75	15	21	2.316	0.128918	1	26	0.910886	0.195564
0.75	15	20	3.547	0.0966102	2	49	0.928163	0.201934
0.75	15	22	2.641	0.124144	1	68	1.04361	0.240342
0.75	30	25	2.69	0.0838034	1	57	0.852632	0.229368
0.75	30	20	2.733	0.107073	1	42	1.12781	0.173244
0.75	30	24	2.897	0.1069	1	26	0.938462	0.164757
0.75	30	21	2.773	0.099259	1	40	0.972967	0.189123
0.5	3	8	2.444	0.131416	1	45	0.78961	0.174386
0.5	3	16	2.579	0.126445	1	30	0.821667	0.136274
0.5	3	22	1.926	0.131157	1	39	0.807692	0.133126
0.5	15	19	2.567	0.141396	1	48	0.802083	0.141145
0.5	15	15	2.314	0.219667	1	42	0.785714	0.134807
0.5	15	16.4	1.412	0.128697	1	18	0.7	0.152975
0.5	15	17	2.121	0.153189	1	49	0.626531	0.1296

## Sheet: Fig.5 
Treatments
rainfall amonunt(Quantity change%)	Rainfall frequency(interval-d)	Germination rate（%）
1.5	3-d	52.8571
1.5	3-d	61.4286
1.5	3-d	53.8462
1.5	5-d	86.6667
1.5	5-d	73.3333
1.5	5-d	100
1.5	10-d	59
1.5	10-d	60
1.5	10-d	58.3333
1.5	15-d	81.8182
1.5	15-d	54.5455
1.5	15-d	60
1.5	30-d	56.1538
1.5	30-d	73.3333
1.5	30-d	61.5385
1.25	3-d	92.8571
1.25	3-d	71.4286
1.25	3-d	100
1.25	5-d	84.6154
1.25	5-d	100
1.25	5-d	90
1.25	10-d	83.3333
1.25	10-d	90
1.25	10-d	86.1538
1.25	15-d	67.1429
1.25	15-d	80
1.25	15-d	68.3333
1.25	30-d	60.9091
1.25	30-d	58.5714
1.25	30-d	50
1	3-d	90
1	3-d	93.3333
1	3-d	93.3333
1	10-d	86.6667
1	10-d	83.3333
1	10-d	92.3077
1	15-d	70
1	15-d	80
1	15-d	91.6667
1	30-d	46.6667
1	30-d	58.5714
1	30-d	63.3333
0.75	3-d	81.8182
0.75	3-d	90.9091
0.75	3-d	80
0.75	10-d	91.6667
0.75	10-d	100
0.75	10-d	76.9231
0.75	15-d	100
0.75	15-d	100
0.75	15-d	100
0.75	30-d	50
0.75	30-d	63.3333
0.75	30-d	73.3333
0.5	3-d	92.3077
0.5	3-d	100
0.5	3-d	100
0.5	15-d	80
0.5	15-d	58.3333
0.5	15-d	80

## Sheet: Fig.6
Rainfall amount	1.5		1.25		1		0.75		0.5		1.5		1.25		1		0.75		0.5		1.5		1.25		1		0.75		0.5		1.5		1.25		1		0.75		0.5		1.5		1.25		1		0.75		0.5
Rainfall frequency	3-d		3-d		3-d		3-d		3-d		5-d		5-d		5-d		5-d		5-d		10-d		10-d		10-d		10-d		10-d		15-d		15-d		15-d		15-d		15-d		30-d		30-d		30-d		30-d		30-d
Days	SWC (%)	SE	SWC (%)	SE	SWC (%)	SE	SWC (%)	SE	SWC (%)	SE	SWC (%)	SE	SWC (%)	SE	SWC (%)	SE	SWC (%)	SE	SWC (%)	SE	SWC (%)	SE	SWC (%)	SE	SWC (%)	SE	SWC (%)	SE	SWC (%)	SE	SWC (%)	SE	SWC (%)	SE	SWC (%)	SE	SWC (%)	SE	SWC (%)	SE	SWC (%)	SE	SWC (%)	SE	SWC (%)	SE	SWC (%)	SE	SWC (%)
2018-05-03	1.54892	0.0774459	1.28798	0.0643992	0.81077	0.0405385	0.631239	0.0315619	0.529279	0.0264639	3.7655	0.188275	3.13683	0.156842	2.14669	0.107335	1.58801	0.0794004	1.10486	0.0552431	7.3923	0.369615	6.2265	0.311325	4.80346	0.240173	3.19216	0.159608	2.11126	0.105563	10.4553	0.2	8.89526	0.444763	6.81869	0.340935	4.74916	0.237458	3.13622	0.156811	15.5432	0.777159	12.5811	0.629057	9.88655	0.494328	7.30258	0.365129	4.16086
2018-05-04	0.577258	0.0288629	0.344556	0.0172278	0.280668	0.0140334	0.210598	0.0105299	0.143795	0.00718976	2.3419	0.117095	1.52312	0.076156	0.532586	0.0266293	0.444987	0.0222493	0.172911	0.00864553	3.331	0.16655	2.85966	0.142983	1.18041	0.0590205	0.742237	0.0371118	0.728763	0.0364382	7.77252	0.18	5.34696	0.267348	3.22022	0.161011	1.8199	0.0909949	1.12163	0.0560816	13.6713	0.683565	8.94673	0.447337	6.85528	0.342764	4.83393	0.241697	2.50072
2018-05-05	0.433322	0.0216661	0.20627	0.0103135	0.185719	0.00928594	0.141861	0.00709305	0.0933615	0.00466808	1.69273	0.0846363	1.06542	0.0532708	0.312494	0.0156247	0.222493	0.0111247	0.109002	0.0054501	2.75019	0.137509	2.12234	0.106117	0.9813	0.049065	0.499983	0.0249991	0.444222	0.0222111	5.60401	0.280201	3.96871	0.198435	2.64703	0.132351	1.32954	0.0664772	0.752141	0.0376071	11.7994	0.58997	5.31232	0.265616	3.82401	0.1912	2.36529	0.118264	0.840589
2018-05-06	0.218918	0.0109459	0.0679835	0.00339918	0.0907696	0.00453848	0.0731239	0.00365619	0.0429279	0.00214639	1.04355	0.0521776	0.607711	0.0303855	0.0924014	0.00462007	0	0	0.0450934	0.00225467	2.16938	0.108469	1.38503	0.0692513	0.782189	0.0391094	0.257729	0.0128865	0.159681	0.00798403	3.4355	0.171775	2.59045	0.129523	2.07384	0.103692	0.83919	0.0419595	0.38265	0.0191325	8.40927	0.420463	4.44315	0.222157	2.78503	0.139252	1.97248	0.0986238	0.615733
2018-05-07	0.577258	0.0288629	0.344556	0.0172278	0.280668	0.0140334	0.210598	0.0105299	0.143795	0.00718976	0.715503	0.0357752	0.596831	0.0298416	0.116693	0.00583466	0.0680085	0.00340043	0.084861	0.00424305	1.6985	0.0849249	1.38862	0.0694308	1.12744	0.0563718	0.263313	0.0131656	0.22055	0.0110275	2.74021	0.13701	2.1488	0.10744	1.68385	0.0841926	0.646366	0.0323183	0.294734	0.0147367	5.01914	0.250957	3.57397	0.178698	1.74605	0.0873027	1.57967	0.0789834	0.390876
2018-05-08	0.433322	0.0216661	0.360377	0.0180188	0.251472	0.0125736	0.122318	0.00611592	0.112297	0.00561487	0.387454	0.0193727	0.585952	0.0292976	0.140985	0.00704925	0.136017	0.00680085	0.124629	0.00623143	1.59	0.0795	1.39221	0.0696103	1.47268	0.0736341	0.268896	0.0134448	0.28142	0.014071	2.04491	0.102245	1.70716	0.0853579	1.29386	0.064693	0.453542	0.0226771	0.206819	0.0103409	3.5	0.175	2.7	0.135	1.68	0.084	1.4	0.07	0.3
2018-05-09	0.218918	0.0109459	0.260377	0.0130188	0.151472	0.00757362	0.0223185	0.00111592	0.0122974	0.000614872	2.3419	0.117095	1.52312	0.076156	0.532586	0.0266293	0.444987	0.0222493	0.17	0.0085	1.49	0.0745	1.29221	0.0646103	1.37268	0.0686341	0.168896	0.00844481	0.18142	0.00907099	1.88	0.094	1.68	0.084	1.09	0.0545	0.35	0.0175	0.18	0.009	2.73201	0.1366	2.34578	0.117289	1.58296	0.0791478	1.31026	0.0655128	0.258647
2018-05-10	0.577258	0.0288629	0.399383	0.0199691	0.261482	0.0130741	0.216069	0.0108035	0.180662	0.00903311	1.93013	0.0965067	1.0333	0.0516649	0.409735	0.0204868	0.304249	0.0152125	0.164273	0.00821364	1.35881	0.0679404	1.34767	0.0673833	1.07688	0.0538439	0.192008	0.00960039	0.169036	0.0084518	1.78417	0.0892083	1.65817	0.0829084	0.952525	0.0476263	0.30087	0.0150435	0.162508	0.0081254	1.96401	0.0982005	1.99156	0.0995781	1.48591	0.0742956	1.22051	0.0610256	0.217295
2018-05-11	0.433322	0.0216661	0.324228	0.0162114	0.28731	0.0143655	0.176501	0.00882505	0.115293	0.00576463	1.51837	0.0759183	0.543475	0.0271737	0.286884	0.0143442	0.163512	0.00817559	0.158546	0.00792728	1.22762	0.0613809	1.40312	0.0701562	0.781075	0.0390538	0.215119	0.010756	0.156652	0.00783262	1.68833	0.0844166	1.63633	0.0818167	0.815051	0.0407525	0.251739	0.012587	0.145016	0.0072508	1.89756	0.0948779	1.83113	0.0915566	1.58312	0.0791562	1.08206	0.054103	0.213533
2018-05-12	0.218918	0.0109459	0.224228	0.0112114	0.18731	0.00936551	0.0765009	0.00382505	0.0152925	0.000764625	1.02056	0.0510281	0.331177	0.0165588	0.172258	0.00861291	0.0963035	0.00481517	0.0840139	0.0042007	1.2923	0.0646148	1.1465	0.0573251	0.743455	0.0371728	0.142165	0.00710823	0.0812634	0.00406317	1.57424	0.078712	1.507	0.0753499	0.874129	0.0437065	0.223385	0.0111693	0.122508	0.0061254	1.8311	0.0915552	1.6707	0.0835351	1.68034	0.0840169	0.943609	0.0471804	0.209771
2018-05-13	0.463562	0.0231781	0.399383	0.0271737	0.261482	0.0130741	0.216069	0.0108035	0.180662	0.00903311	0.522759	0.0261379	0.118879	0.00594393	0.0576323	0.00288161	0.0290951	0.00145476	0.00948227	0.000474113	1.09459	0.0547295	0.889879	0.0444939	0.705835	0.0352918	0.06921	0.0034605	0.00587441	0.00029372	1.46015	0.0730074	1.37766	0.068883	0.933208	0.0466604	0.195031	0.00975157	0.1	0.005	1.66652	0.083326	1.56113	0.0780565	1.56394	0.0781972	0.798141	0.0399071	0.209153
2018-05-14	0.285263	0.0142631	0.324228	0.0165588	0.114353	0.00571763	0.00803471	0.000401735	0.00903311	0.000451656	2	0.1	1.2	0.06	0.65	0.0325	0.19	0.0095	0.15	0.0075	3.131	0.15655	2.65966	0.132983	1.38041	0.0690205	1.22237	0.0611183	0.328763	0.0164382	1.41034	0.0705169	1.37646	0.068823	0.82595	0.0412975	0.192098	0.00960491	0.09	0.0045	1.50193	0.0750967	1.45156	0.072578	1.44755	0.0723776	0.652674	0.0326337	0.208534
2018-05-15	0.106964	0.00534818	0.224228	0.00594393	0.167223	0.00836115	0	0	0	0	1.35066	0.0675332	0.7612	0.03806	0.455808	0.0227904	0.157686	0.0078843	0.140297	0.00701485	2.51713	0.125856	2.00972	0.100486	1.17553	0.0587763	1.18975	0.0594873	0.171695	0.00858477	1.36053	0.0680263	1.37526	0.0687629	0.718693	0.0359346	0.189165	0.00945824	0.0862166	0.00431083	1.40193	0.0700967	1.35156	0.067578	1.34755	0.0673776	0.552674	0.0276337	0.208534
2018-05-16	0.463562	0.0231781	0.199383	0.00996913	0.0614822	0.00307411	0.0160694	0.000803471	0.180662	0.00903311	1.04355	0.0521776	0.607711	0.0303855	0.124014	0.00620071	0.1	0.005	0.09	0.0045	2.31713	0.115856	1.80972	0.0904861	0.975526	0.0487763	0.989745	0.0494873	0.159681	0.00798403	1.30526	0.0652632	1.27526	0.0637629	0.718693	0.0359346	0.179165	0.00895824	0.0862166	0.00431083	1.3	0.065	1.25	0.0625	1.2	0.06	0.5	0.025	0.2
[truncated: 1 more columns]
